# Supplementary material for: Organizational capital and audit outcomes
Source: Research Square preprint supplement (doi:10.21203/rs.3.rs-7837103/v1), 2025-11-04
Supplement: Supplementary file 1 [file 6bd2f896160762818ab75803.docx]

**Highlights**

- We study the impact organizational capital (OC) on audit outcome.
- We document a negative impact of OC on audit fees, audit delays, going concern opinion, internal control, and financial restatement.
- The negative impact of OC on audit outcome is more pronounced for firms with high information asymmetry, poor corporate governance and audited by non-specialist auditors.
- We further show that OC reduces the probability of a lawsuit.
